# Supplementary material for: The Influence of Alcohol Consumption, Depressive Symptoms and Sleep Duration on Cognition: Results from the China Health and Retirement Longitudinal Study
Source: MDPI journal article supplement (doi:10.3390/ijerph191912574), 2022-10-01
Supplement: s1 [file s1]

## **contents**

**Table S1** Sensitive Analyses for Baseline Characteristics of the Study Population (Totals and Stratified According to Sleep Duration, and Alcohol Consumption).

**Table S2** Sensitive Analyses for Cross-Sectional Association Between Sleep Duration per Night, Alcohol Consumption (time per month), covariates, and Global Cognitive Function at Baseline Using Generalized Linear Model

**Table S3** Sensitivity Analyses for Mean Difference in Rate of Change in Global Cognitive Decline During Follow-up Using Generalized Estimating Equation

**Figure S1** Sensitivity Analyses for the Trajectory of Late Life Cognitive Decline with Age.

**Table S1.** Sensitive Analyses for Baseline Characteristics of the Study Population (Totals and Stratified According to Sleep Duration, and Alcohol Consumption).

|                                         | All          | Sleep duration<br>(hours per night)<br>(n=10248) |              |             | <i>p</i> value | Alcohol Consumption<br>(time per month)<br>(n=10272) |              |              | <i>p</i> value |
|-----------------------------------------|--------------|--------------------------------------------------|--------------|-------------|----------------|------------------------------------------------------|--------------|--------------|----------------|
|                                         |              | ≤6h                                              | 7-8h         | ≥9h         |                | Non-drinkers                                         | ≤1           | >1           |                |
| N (%)                                   | 11204        | 5055(49.3)                                       | 4327(42.2)   | 866(8.5)    |                | 6589(64.1)                                           | 852(8.3)     | 2831(27.6)   |                |
| Age (years),<br>mean (SD)               | 59.02(10.16) | 59.03(10.09)                                     | 59.07(10.21) | 58.71(9.86) | <b>0.506</b>   | 58.98(10.09)                                         | 59.18(10.07) | 59.06(10.19) | <b>0.708</b>   |
| Gender(women),<br>n (%)                 | 5818(51.9)   | 2627(52.0)                                       | 2207(51.0)   | 473(54.7)   | <b>0.136</b>   | 3423(52.0)                                           | 431(50.6)    | 1472(52.0)   | <b>0.730</b>   |
| Education level,<br>n (%)               |              |                                                  |              |             | <b>0.253</b>   |                                                      |              |              | <b>0.265</b>   |
| No formal<br>education or<br>illiterate | 3030(27.1)   | 1371(27.2)                                       | 1132(26.2)   | 261(30.3)   |                | 1735(26.4)                                           | 238(28.0)    | 808(28.6)    |                |
| Did not finish<br>primary school        | 1960(17.6)   | 895(17.8)                                        | 730(16.9)    | 148(17.2)   |                | 1143(17.4)                                           | 156(18.4)    | 503(17.8)    |                |
| Finished middle<br>school               | 5865(52.5)   | 2637(52.3)                                       | 2321(53.8)   | 434(50.4)   |                | 3499(53.3)                                           | 430(50.6)    | 1446(51.3)   |                |
| Higher and further<br>education         | 266(2.4)     | 119(2.4)                                         | 110(2.6)     | 16(1.9)     |                | 163(2.5)                                             | 22(2.6)      | 53(1.9)      |                |
| Others                                  | 46(0.4)      | 18(0.4)                                          | 20(0.5)      | 2(0.2)      |                | 26(0.4)                                              | 4(0.5)       | 11(0.4)      |                |

|                                                               |               |               |               |               |                  |               |               |               |                  |
|---------------------------------------------------------------|---------------|---------------|---------------|---------------|------------------|---------------|---------------|---------------|------------------|
| Living with a partner,<br>n (%)                               | 8980(80.1)    | 4056(80.3)    | 3449(79.9)    | 698(80.9)     | <b>0.825</b>     | 5295(80.5)    | 680(79.8)     | 2267(80.2)    | <b>0.069</b>     |
| Cigarette<br>consumption, n (%)                               | 4451(39.7)    | 1962(38.8)    | 1726(39.9)    | 316(36.5)     | <b>0.148</b>     | 2609(39.7)    | 339(39.9)     | 1155(40.9)    | <b>0.540</b>     |
| Blood pressure, mean<br>(SD), mm Hg                           |               |               |               |               |                  |               |               |               |                  |
| Systolic                                                      | 130.53(21.75) | 130.20(21.61) | 130.98(22.08) | 131.29(21.99) | <b>0.290</b>     | 130.67(21.89) | 132.14(23.31) | 130.02(21.23) | <b>0.123</b>     |
| Diastolic                                                     | 75.86(12.21)  | 75.78(12.19)  | 76.01(12.44)  | 76.03(11.92)  | <b>0.781</b>     | 75.89(12.19)  | 76.30(13.82)  | 75.80(11.96)  | <b>0.508</b>     |
| Body mass index<br>(kg/m <sup>2</sup> )                       | 23.46(3.98)   | 23.46(4.01)   | 23.45(4.00)   | 23.44(3.96)   | <b>0.845</b>     | 23.39(3.97)   | 23.46(3.75)   | 23.61(4.14)   | <b>0.166</b>     |
| Cognitive function<br>domain scores (z-<br>scores), mean (SD) |               |               |               |               |                  |               |               |               |                  |
| The memory score                                              | 0.08(1.01)    | 0.09(1.00)    | 0.15(1.01)    | 0.14(0.98)    | <b>0.020</b>     | 0.11(1.03)    | 0.26(0.99)    | 0.12(0.97)    | <b>0.001</b>     |
| The orientation test<br>score                                 | 0.09(0.96)    | 0.13(0.95)    | 0.16(0.92)    | 0.11(0.93)    | <b>0.117</b>     | 0.10(0.95)    | 0.28(0.84)    | 0.18(0.90)    | <b>&lt;0.001</b> |
| The executive score                                           | 0.03(1.04)    | 0.34(0.91)    | 0.38(0.88)    | 0.34(0.90)    | <b>0.091</b>     | 0.27(0.92)    | 0.50(0.83)    | 0.51(0.83)    | <b>&lt;0.001</b> |
| The total z scores                                            | 0.11(0.99)    | 0.08(1.00)    | 0.15(0.98)    | 0.12(0.96)    | <b>0.023</b>     | 0.05(1.01)    | 0.30(0.93)    | 0.21(0.93)    | <b>&lt;0.001</b> |
| Hypertension,<br>n (%)                                        | 2728(24.3)    | 1282(25.5)    | 1022(23.7)    | 208(24.0)     | <b>0.114</b>     | 1615(24.7)    | 211(24.9)     | 683(24.3)     | <b>0.924</b>     |
| Diabetes, n (%)                                               | 621(5.5)      | 305(6.1)      | 236(5.5)      | 36(4.2)       | <b>0.065</b>     | 379(5.8)      | 62(7.4)       | 132(4.7)      | <b>0.008</b>     |
| Dyslipidemia, n (%)                                           | 1026(9.2)     | 494(10.0)     | 396(9.3)      | 69(8.1)       | <b>0.185</b>     | 623(9.7)      | 86(10.3)      | 247(8.9)      | <b>0.369</b>     |
| Coronary heart<br>disease, n (%)                              | 1300(11.6)    | 696(13.9)     | 444(10.3)     | 83(9.7)       | <b>&lt;0.001</b> | 761(11.6)     | 98(11.6)      | 335(11.9)     | <b>0.931</b>     |
| Stroke, n (%)                                                 | 212(1.9)      | 108(2.1)      | 67(1.6)       | 19(2.2)       | <b>0.091</b>     | 127(1.9)      | 11(1.3)       | 59(2.1)       | <b>0.338</b>     |
| Chronic lung disease,                                         | 1050(9.4)     | 576(11.4)     | 335(7.8)      | 69(8.0)       | <b>&lt;0.001</b> | 593(9.1)      | 92(10.8)      | 269(9.6)      | <b>0.219</b>     |

|               |          |          |          |         |        |          |         |          |       |
|---------------|----------|----------|----------|---------|--------|----------|---------|----------|-------|
| n (%)         |          |          |          |         |        |          |         |          |       |
| Asthma, n (%) | 375(3.3) | 211(4.2) | 108(2.5) | 30(3.5) | <0.001 | 213(3.2) | 28(3.3) | 103(3.7) | 0.605 |

**Table S2.** Sensitive Analyses for Cross-Sectional Association Between Sleep Duration per Night, Alcohol Consumption (time per month), covariates, and Global Cognitive Function at Baseline Using Generalized Linear Model

|                                          | B,95%CI, P Value                |                                 |                                 |                                 |                                 |                                 |                                 |                                 |
|------------------------------------------|---------------------------------|---------------------------------|---------------------------------|---------------------------------|---------------------------------|---------------------------------|---------------------------------|---------------------------------|
|                                          | The memory score                |                                 | The orientation test score      |                                 | The executive score             |                                 | The total z scores              |                                 |
|                                          | Model1 <sup>a</sup><br>(n=7414) | Model2 <sup>b</sup><br>(n=5848) | Model1 <sup>a</sup><br>(n=7725) | Model2 <sup>b</sup><br>(n=6130) | Model1 <sup>a</sup><br>(n=9332) | Model2 <sup>b</sup><br>(n=7439) | Model1 <sup>a</sup><br>(n=6994) | Model2 <sup>b</sup><br>(n=5517) |
| Sleep duration<br>(hours per 24h period) |                                 |                                 |                                 |                                 |                                 |                                 |                                 |                                 |
| ≤6h                                      | -0.140                          | -0.147                          | -0.055                          | -0.034                          | -0.049                          | -0.076                          | -0.119                          | -0.127                          |
|                                          | -0.233 to -0.047                | -0.252 to -0.041                | -0.141 to 0.030                 | -0.130 to 0.061                 | -0.133 to 0.035                 | -0.171 to 0.018                 | -0.211 to -0.028                | -0.230 to -0.0024               |
| <i>P</i> value                           | 0.003                           | 0.006                           | 0.202                           | 0.480                           | 0.249                           | 0.113                           | 0.011                           | 0.016                           |
| 7-8h                                     | REF                             |
| ≥9h                                      | -0.011                          | 0.029                           | -0.105                          | -0.051                          | 0.007                           | 0.037                           | -0.004                          | 0.034                           |
|                                          | -0.182 to 0.159                 | -0.168 to 0.226                 | -0.261 to 0.051                 | -0.228 to 0.127                 | -0.148 to 0.162                 | -0.141 to 0.214                 | -0.173 to 0.165                 | -0.160 to 0.228                 |

|                                             |                 |                 |                 |                 |                  |                 |                 |                 |
|---------------------------------------------|-----------------|-----------------|-----------------|-----------------|------------------|-----------------|-----------------|-----------------|
| <i>P</i> value                              | <b>0.896</b>    | <b>0.771</b>    | <b>0.185</b>    | <b>0.577</b>    | <b>0.928</b>     | <b>0.687</b>    | <b>0.962</b>    | <b>0.731</b>    |
| Whether exposed to alcohol (time per month) |                 |                 |                 |                 |                  |                 |                 |                 |
| Non-drinkers                                | REF             | REF             | REF             | REF             | REF              | REF             | REF             | REF             |
| <=1                                         | 0.356           | 0.248           | 0.165           | 0.161           | 0.196            | 0.026           | 0.401           | 0.279           |
|                                             | 0.046 to 0.666  | -0.131 to 0.628 | -0.110 to 0.441 | -0.167 to 0.489 | -0.077 to 0.469  | -0.293 to 0.345 | 0.097 to 0.706  | -0.087 to 0.644 |
| <i>P</i> value                              | <b>0.025</b>    | <b>0.199</b>    | <b>0.240</b>    | <b>0.337</b>    | <b>0.160</b>     | <b>0.873</b>    | <b>0.010</b>    | <b>0.135</b>    |
| >1                                          | 0.107           | 0.130           | 0.052           | 0.067           | 0.332            | 0.335           | 0.243           | 0.261           |
|                                             | -0.079 to 0.292 | -0.085 to 0.344 | -0.118 to 0.222 | -0.126 to 0.260 | 0.165 to 0.500   | 0.144 to 0.526  | 0.058 to 0.427  | 0.049 to 0.472  |
| <i>P</i> value                              | <b>0.260</b>    | <b>0.236</b>    | <b>0.548</b>    | <b>0.494</b>    | <b>&lt;0.001</b> | <b>0.001</b>    | <b>0.010</b>    | <b>0.016</b>    |
| Age(years)                                  | 0.002           | 0.001           | 0.000           | -0.001          | 0.001            | 0.001           | 0.002           | 0.002           |
|                                             | -0.001 to 0.004 | -0.001 to 0.004 | -0.002 to 0.002 | -0.003 to 0.002 | -0.001 to 0.004  | -0.001 to 0.004 | -0.001 to 0.004 | -0.001 to 0.004 |
| <i>P</i> value                              | <b>0.163</b>    | <b>0.317</b>    | <b>0.973</b>    | <b>0.570</b>    | <b>0.206</b>     | <b>0.290</b>    | <b>0.157</b>    | <b>0.282</b>    |
| Gender                                      | 0.019           | 0.016           | 0.008           | 0.001           | 0.014            | -0.008          | 0.023           | 0.014           |
|                                             | -0.031 to 0.068 | -0.041 to 0.072 | -0.037 to 0.054 | -0.050 to 0.052 | -0.030 to 0.059  | -0.058 to 0.042 | -0.026 to 0.073 | -0.042 to 0.069 |
| <i>P</i> value                              | <b>0.460</b>    | <b>0.586</b>    | <b>0.725</b>    | <b>0.966</b>    | <b>0.528</b>     | <b>0.756</b>    | <b>0.352</b>    | <b>0.629</b>    |

|                         |                 |                 |                 |                 |                 |                 |                 |                 |
|-------------------------|-----------------|-----------------|-----------------|-----------------|-----------------|-----------------|-----------------|-----------------|
| Education level         | 0.021           | 0.017           | 0.014           | 0.012           | 0.018           | 0.015           | 0.025           | 0.024           |
|                         | 0.008 to 0.033  | 0.002 to 0.032  | 0.002 to 0.026  | -0.001 to 0.025 | 0.006 to 0.030  | 0.002 to 0.028  | 0.012 to 0.037  | 0.010 to 0.039  |
| <i>P</i> value          | <b>0.002</b>    | <b>0.023</b>    | <b>0.024</b>    | <b>0.077</b>    | <b>0.003</b>    | <b>0.025</b>    | <b>0.001</b>    | <b>0.001</b>    |
| Marriage                | 0.002           | 0.007           | -0.013          | -0.007          | -0.002          | 0.001           | 0.002           | 0.008           |
|                         | -0.017 to 0.021 | -0.014 to 0.028 | -0.030 to 0.004 | -0.026 to 0.012 | -0.019 to 0.015 | -0.018 to 0.020 | -0.017 to 0.021 | -0.013 to 0.029 |
| <i>P</i> value          | <b>0.825</b>    | <b>0.519</b>    | <b>0.138</b>    | <b>0.473</b>    | <b>0.843</b>    | <b>0.898</b>    | <b>0.818</b>    | <b>0.457</b>    |
| Blood pressure          |                 |                 |                 |                 |                 |                 |                 |                 |
| Systolic                | NA              | -0.002          | NA              | 0.000           | NA              | -0.001          | NA              | -0.001          |
|                         |                 | -0.005 to 0.002 |                 | -0.002 to 0.001 |                 | -0.002 to 0.001 |                 | -0.004 to 0.002 |
| <i>P</i> value          |                 | <b>0.309</b>    |                 | <b>0.851</b>    |                 | <b>0.446</b>    |                 | <b>0.537</b>    |
| Diastolic               | NA              | 0.000           | NA              | -0.001          | NA              | -0.001          | NA              | 0.000           |
|                         |                 | -0.002 to 0.002 |                 | -0.004 to 0.002 |                 | -0.004 to 0.002 |                 | -0.002 to 0.002 |
| <i>P</i> value          |                 | <b>0.864</b>    |                 | <b>0.436</b>    |                 | <b>0.403</b>    |                 | <b>0.938</b>    |
| Body mass index (kg/m2) | NA              | 0.000           | NA              | 0.000           | NA              | -0.004          | NA              | -0.004          |
|                         |                 | -0.007 to 0.007 |                 | -0.006 to 0.006 |                 | -0.010 to 0.002 |                 | -0.010 to 0.003 |
| <i>P</i> value          |                 | <b>0.990</b>    |                 | <b>0.881</b>    |                 | <b>0.171</b>    |                 | <b>0.291</b>    |

|                       |    |                 |    |                 |    |                 |    |                 |
|-----------------------|----|-----------------|----|-----------------|----|-----------------|----|-----------------|
| Cigarette consumption | NA | 0.027           | NA | 0.031           | NA | 0.011           | NA | 0.050           |
|                       |    | -0.027 to 0.081 |    | -0.018 to 0.080 |    | -0.038 to 0.059 |    | -0.003 to 0.103 |
| <i>P</i> value        |    | <b>0.326</b>    |    | <b>0.215</b>    |    | <b>0.668</b>    |    | <b>0.067</b>    |
| Hypertension          | NA | 0.075           | NA | -0.008          | NA | -0.019          | NA | 0.031           |
|                       |    | 0.009 to 0.140  |    | -0.067 to 0.052 |    | -0.078 to 0.039 |    | -0.034 to 0.096 |
| <i>P</i> value        |    | <b>0.026</b>    |    | <b>0.799</b>    |    | <b>0.520</b>    |    | <b>0.354</b>    |
| Diabetes              | NA | -0.078          | NA | -0.014          | NA | 0.009           | NA | -0.077          |
|                       |    | -0.200 to 0.044 |    | -0.125 to 0.097 |    | -0.100 to 0.118 |    | -0.199 to 0.045 |
| <i>P</i> value        |    | <b>0.211</b>    |    | <b>0.802</b>    |    | <b>0.871</b>    |    | <b>0.217</b>    |
| Dyslipidemia          | NA | 0.032           | NA | 0.016           | NA | 0.028           | NA | 0.042           |
|                       |    | -0.067 to 0.130 |    | -0.073 to 0.105 |    | -0.059 to 0.115 |    | -0.055 to 0.138 |
| <i>P</i> value        |    | <b>0.527</b>    |    | <b>0.727</b>    |    | <b>0.525</b>    |    | <b>0.397</b>    |

|                        |    |                 |    |                 |    |                 |    |                 |
|------------------------|----|-----------------|----|-----------------|----|-----------------|----|-----------------|
| Coronary heart disease | NA | -0.035          | NA | -0.019          | NA | 0.006           | NA | -0.045          |
|                        |    | -0.120 to 0.050 |    | -0.097 to 0.059 |    | -0.071 to 0.082 |    | -0.129 to 0.040 |
|                        |    | 0.424           |    | 0.636           |    | 0.887           |    | 0.300           |
| Stroke                 | NA | -0.030          | NA | 0.012           | NA | -0.059          | NA | -0.016          |
|                        |    | -0.226 to 0.166 |    | -0.168 to 0.193 |    | -0.236 to 0.117 |    | -0.211 to 0.180 |
|                        |    | 0.762           |    | 0.895           |    | 0.509           |    | 0.875           |
| Chronic lung disease   | NA | 0.002           | NA | -0.013          | NA | 0.052           | NA | 0.014           |
|                        |    | -0.092 to 0.096 |    | -0.099 to 0.073 |    | -0.032 to 0.136 |    | -0.080 to 0.108 |
|                        |    | 0.970           |    | 0.765           |    | 0.222           |    | 0.777           |
| Asthma                 | NA | 0.155           | NA | 0.098           | NA | -0.034          | NA | 0.136           |
|                        |    | 0.004 to 0.306  |    | -0.039 to 0.235 |    | -0.170 to 0.103 |    | -0.012 to 0.285 |
|                        |    | 0.044           |    | 0.161           |    | 0.628           |    | 0.072           |



**Table S3.** Sensitivity Analyses for Mean Difference in Rate of Change in Global Cognitive Decline During Follow-up Using Generalized Estimating Equation

|                                             | $\beta$ (95% CI) <sup>a</sup> | p Value |
|---------------------------------------------|-------------------------------|---------|
| Sleep duration (hours per 24h period)       |                               |         |
| $\leq 6h$                                   | -0.121 (-0.192 to -0.051)     | <0.05   |
| 7-8h                                        | REF                           | REF     |
| $\geq 9h$                                   | 0.007 (-0.126 to 0.139)       | 0.923   |
| Whether exposed to alcohol (time per month) |                               |         |
| No                                          | REF                           | REF     |
| $\leq 1$                                    | 0.186 (-0.056 to 0.427)       | 0.133   |
| $> 1$                                       | 0.117 (-0.027 to 0.261)       | 0.112   |
| Sleep duration * Alcohol consumption        |                               | 0.057   |
| Age (years)                                 | -0.001 (-0.003 to 0.001)      | 0.213   |
| Gender                                      | .026 (-0.012 to 0.063)        | 0.183   |
| Education level                             | 0.012 (0.002 to 0.022)        | <0.05   |
| Marriage                                    | 0.008 (-0.006 to 0.022)       | 0.250   |
| Blood pressure                              |                               |         |

|                         |                           |       |
|-------------------------|---------------------------|-------|
| Systolic                | 0.001 (-0.001 to 0.002)   | 0.273 |
| Diastolic               | -0.001 (-0.003 to 0.001)  | 0.303 |
| Body mass index (kg/m2) | -0.001 (-0.005 to 0.004)  | 0.721 |
| Cigarette consumption   | 0.033 (-0.003 to 0.070)   | 0.071 |
| Hypertension            | 0.031 (-0.013 to 0.075)   | 0.162 |
| Diabetes                | -0.089 (-0.171 to -0.006) | <0.05 |
| Dyslipidemia            | -0.059 (-0.124 to 0.006)  | 0.077 |
| Coronary heart disease  | -0.035 (-0.092 to 0.023)  | 0.234 |
| Stroke                  | -0.017 (-0.149 to 0.115)  | 0.802 |
| Chronic lung disease    | 0.027 (-0.037 to 0.090)   | 0.409 |
| Asthma                  | 0.032 (-0.068 to 0.133)   | 0.529 |

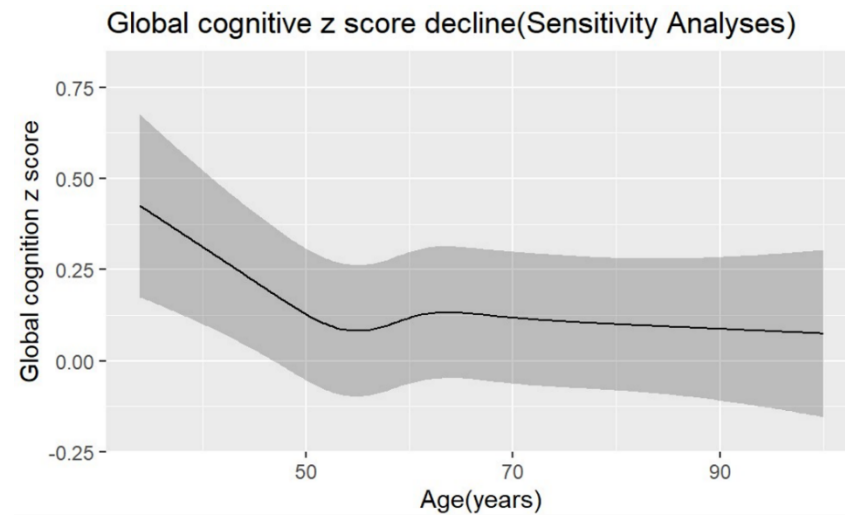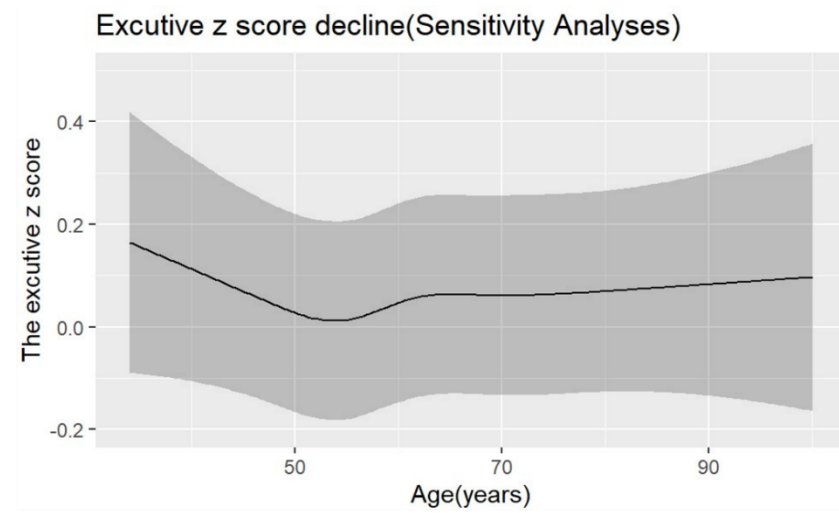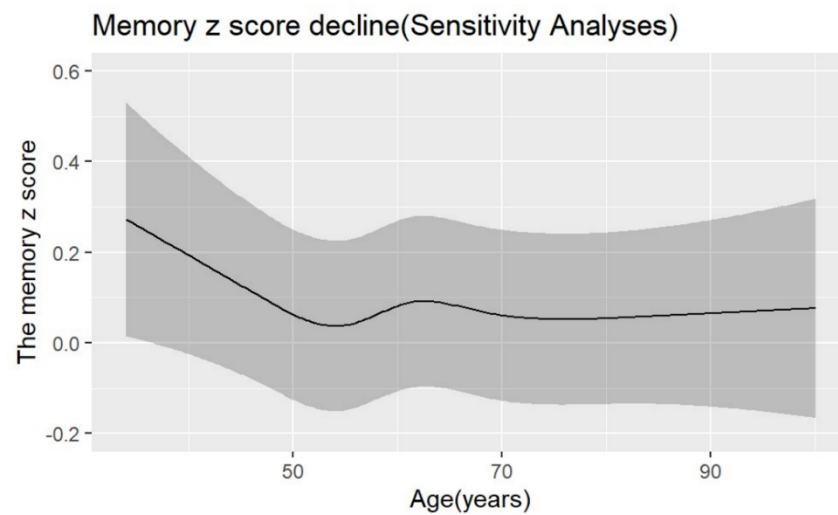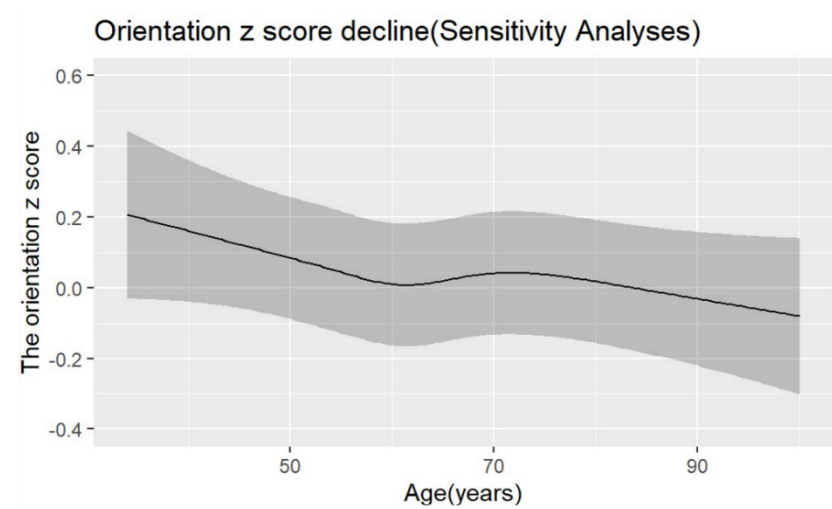

**Figure S1** Sensitivity Analyses for The Trajectory of Late Life Cognitive Decline with Age.
